# Supplementary material for: A single‐domain small protein Med‐ORF10 regulates the production of antitumour agent medermycin in Streptomyces
Source: PubMed Central journal article supplement — Microb Biotechnol. 2021 Jun 17;14(5):1918–30. doi: 10.1111/1751-7915.13834 (PMC8449675; doi:10.1111/1751-7915.13834), 2021-06-17
Supplement: MBT2-14-1918-s001.pdf [file MBT2-14-1918-s001.pdf]

## Supporting information

### **A single-domain small protein Med-ORF10 able to regulate the production of antitumor agent medermycin in *Streptomyces***

Xiaofeng Cai<sup>1,2,3,#</sup>, Caiyun Li<sup>1,#</sup>, Koji Ichinose<sup>4,#</sup>, Yali Jiang<sup>2</sup>, Ming Liu<sup>2</sup>, Huili Wang<sup>2</sup>, Caixia Gong<sup>2</sup>, Le Li<sup>2</sup>, Juan Wan<sup>2</sup>, Yiming Zhao<sup>1</sup>, Qing Yang<sup>5</sup>, Aiyong Li<sup>1,2,\*</sup>

<sup>1</sup>Helmholtz International Lab for Anti-Infectives, Shandong University-Helmholtz Institute of Biotechnology, State Key Laboratory of Microbial Technology, Shandong University, Qingdao 266237, P.R. China

<sup>2</sup>The College of Life Sciences, Key Laboratory of Pesticide and Chemical Biology, Ministry of Education, Central China Normal University, Wuhan 430079, P.R. China

<sup>3</sup>School of Pharmacy, Huazhong University of Science and Technology, Wuhan 430030, P.R. China

<sup>4</sup>Research Institute of Pharmaceutical Sciences, Musashino University, Tokyo 202-8585, Japan

<sup>5</sup>State Key Laboratory of Genetic Engineering, School of Life Sciences, Fudan University, Songhu Road 2005, Shanghai, 200438, China

#### **\* Correspondence:**

Shandong University, Qingdao 266237, P.R. China, TEL/FAX: +86-532-67722918,

E-mail: ayli@sdu.edu.cn (Aiyong Li)

#: Three authors have equal contributions.

---

The present address of Xiaofeng Cai:

No. 13, Hangkong Road, Qiaokou District, Wuhan City, Hubei Province, 430030

**Table S1.** Primers used in this study.

| <b>Primer name</b> | <b>Sequence (with the restriction enzyme sites underlined and start/stop codon in bold)</b>                 | <b>Enzyme sites</b> |
|--------------------|-------------------------------------------------------------------------------------------------------------|---------------------|
| med10-A-Red        | GCGGACCGTCCGCGCGGCCTGACGAAGGGAGA<br>ACC <b>ATG</b> ATTCCGGGGATCCGTCGACC<br>CCACGGAAGGGAGCGGGGGGACGGGGGGCGGG |                     |
| med10-B-Red        | GCC<br>GG <b>TCAT</b> GTAGGCTGGAGCTGCTTC                                                                    |                     |
| med10-A-PIJ        | GGAATTCC <b>ATATG</b> TCCACCCACCGAGTCC                                                                      | <i>NdeI</i>         |
| med10-B-PIJ        | CGGGATCCGG <b>TCAC</b> GATTCCGGCAGGTG                                                                       | <i>BamHI</i>        |
| med10-A-WHM        | CGGGATCCCGGGAGAACC <b>ATG</b> TCCACC-3'                                                                     | <i>BamHI</i>        |
| med10-B-WHM        | CGGAATTCCGG <b>TCAC</b> GATTCCGGCAG                                                                         | <i>EcoRI</i>        |
| med10-A-PET        | GGAATTCC <b>ATATG</b> TCCACCCACCGAGTC                                                                       | <i>NdeI</i>         |
| med10-B-PET        | CCCAAGCTTCGATTCCGGCAGGTGGTC<br>GGAATTCC <b>ATATG</b> AGCGGAACCGGCCGGCCCAC                                   | <i>HindIII</i>      |
| med12-A-PET        | CG<br>TGGCG                                                                                                 | <i>NdeI</i>         |
| med12B-PET         | CCCAAGCTTCGACGCGCTCCCGGGCTCGGCTTC                                                                           | <i>HindIII</i>      |
| Pmed12-A           | CGGGATCCTGACTGACCTCGGAC                                                                                     |                     |
| Pmed12-B           | GGGTACCCGTTTTCTTCTCCCG                                                                                      |                     |
| med12A-RT          | CCACCAGAGGAACGATGT                                                                                          |                     |
| med12B-RT          | ATGGGCGAGCGGATGAA                                                                                           |                     |
| 23SrRNA-A-RT       | GGAGTAGTGGCGAGCGAAA                                                                                         |                     |
| 23SrRNA-B-RT       | CGGCAGACCGTAAAAGAGAGA                                                                                       |                     |
| med29-A-pET        | GGAATTCC <b>ATATG</b> CTGTCCGTGGTGATG                                                                       | <i>NdeI</i>         |
| med29-B-pET        | CCCAAGCTTCGGTCCCGTTCGT                                                                                      | <i>HindIII</i>      |
| 00131-F            | ATGTCGACCGCTTCCAGAC                                                                                         |                     |
| 00131-R            | AGGAGGAGTTCGTTGGTGG                                                                                         |                     |
| 00208-F            | GTGTTGATGAAGCCGAACG                                                                                         |                     |
| 00208-R            | CCTCTACGGCTACGTCTTC                                                                                         |                     |
| 0682-F             | AACGGCCTGTTCTCTAC                                                                                           |                     |
| 0682-R             | GACCTCCAGTTCGCTCTC                                                                                          |                     |
| 2954-F             | TCGTCGAGACGTACTTCAAG                                                                                        |                     |
| 2954-R             | CAGAGCCAGCTTCATCGAAC                                                                                        |                     |
| 4359-F             | ACGGGCTGAAGAACCTGGTC                                                                                        |                     |
| 4359-R             | AGTGCCTCCTCTTCGACCTC                                                                                        |                     |
| 4360-F             | CCTCTACGGCTACGTCTTC                                                                                         |                     |
| 4360-R             | GTGTTGATGAAGCCGAACG                                                                                         |                     |
| 4361-F             | ACCGACATCGCCCTAGTTC                                                                                         |                     |
| 4361-R             | CAGGTAGGAGTACGCGACG                                                                                         |                     |
| 4412-F             | TTCTGCTCGTCTCCGAACTC                                                                                        |                     |
| 4412-R             | TCCTGAGTCTCCTCGGTAC                                                                                         |                     |
| 0760-F             | AGTCGTTTCGACCTGGTGC                                                                                         |                     |
| 0760-R             | CGGGTACTTCCAGGCAG                                                                                           |                     |
| 0774-F             | TCTTCTCCACCTCCGTCATC                                                                                        |                     |
| 0774-R             | AGGTTCTGACCGAGGCACTG                                                                                        |                     |
| 1174-F             | AACTGCTACCACGCATACCC                                                                                        |                     |
| 1174-R             | TTGGGGCTGTAGGAACAAAG                                                                                        |                     |
| 1124-F             | CCAAGGACAAGGTCACCG                                                                                          |                     |
| 1124-R             | AGAACGGGCAGGAGATCAG                                                                                         |                     |
| 1125-F             | GTTTTCCCGAACGCACAC                                                                                          |                     |
| 1125-R             | GACCCTGGTGAGGAACTC                                                                                          |                     |
| 1454-F             | CATGTCGATGACGCTCAC                                                                                          |                     |
| 1454-R             | CAGGTGTAGGAGAGGCAG                                                                                          |                     |

|        |                      |
|--------|----------------------|
| 1866-F | GGGAAGACGTACACATC    |
| 1866-R | CAGTGGAAGTCCTCCTTG   |
| 1901-F | CTGATCGAACCGCTCTCC   |
| 1901-R | GAGCCGTAGATGAGGACG   |
| 2113-F | CAAGCTCGCGAAGTACAC   |
| 2113-R | AACATCTCGGTACGCTC    |
| 3073-F | GGATGCTGCAGAACAACCTC |
| 3073-R | ATCGTCTCGTCCTGCTTGAG |
| 3285-F | TGTTCAACACCCTCACCAAG |
| 3285-R | CGTCGAGTTCGTACGTCTTG |
| 3479-F | GGTAACAGCAACGGCTCAC  |
| 3479-R | GTCCTTCCACTCCCAGATG  |
| 5223-F | ACGACGACAACCTGGAGTTC |
| 5223-R | CCTGTTCGAAGCGGTACTTC |
| 6171-F | TCAACCTCACCGTCAAC    |
| 6171-R | CTCGCAGGCGTTCTTG     |
| 7470-F | TGGTCCGTATGACCGTG    |
| 7470-R | TCGGCCAGCAGGAAAAG    |

---

**Table S2.** The downregulated genes in CH999/pIK340- $\Delta$ med10 ( $\log_2(\text{fold change}) > 1$  or  $< -1$  and P-value  $< 0.05$ ) using transcriptomics.

| Name       | Putative gene product                      | Fold-change |
|------------|--------------------------------------------|-------------|
| SCO3470    | transposase                                | -           |
| SCO3471    | extracellular agarase                      | -           |
| SCO3472    | transposase remnant                        | -           |
| SCO3473    | aldolase                                   | -           |
| SCO3474    | sugar kinase                               | -           |
| SCO3475    | galactonate dehydratase                    | -           |
| SCO3476    | short-chain dehydrogenase                  | -           |
| SCO3477    | dehydrogenase                              | -           |
| SCO3478    | dehydrogenase                              | -           |
| SCO3479    | beta-galactosidase                         | -           |
| SCO3480    | racemase                                   | -           |
| SCO3481    | hypothetical protein                       | -           |
| SCO3482    | sugar-permease                             | -           |
| SCO3483    | integral membrane transport protein        | -           |
| SCO3484    | sugar-binding protein                      | -           |
| SCO3485    | LacI family transcriptional regulator      | -           |
| SCO3486    | aldehyde dehydrogenase                     | -           |
| SCO3487    | hydrolase                                  | -           |
| SCO3488    | -//-                                       | -           |
| SCO1174    | aldehyde dehydrogenase                     | -6.9992     |
| Novel00039 | -//-                                       | -5.8409     |
| Novel00038 | -//-                                       | -4.2944     |
| SCO0774    | cytochrome P450                            | -4.2725     |
| sRNA00087  | -//-                                       | -4.1381     |
| SCO2113    | bacterioferritin                           | -4.0842     |
| Novel00040 | -//-                                       | -4.061      |
| SCO1866    | L-ectoine synthase                         | -3.8707     |
| SCO0773    | ferredoxin                                 | -3.8704     |
| SCO6005    | lipoprotein                                | -3.7677     |
| SCO1456    | hypothetical protein                       | -3.7447     |
| SCO3953    | RNA 2'-phosphotransferase-like protein     | -3.7258     |
| SCO3073    | urocanate hydratase                        | -3.7078     |
| Novel00072 | -//-                                       | -3.678      |
| SCO6171    | oxidoreductase                             | -3.6497     |
| SCO1457    | transporter                                | -3.6223     |
| SCO3286    | hypothetical protein                       | -3.5629     |
| SCO7470    | phenylacetic acid degradation protein Paal | -3.5432     |
| SCO6170    | oxidoreductase subunit                     | -3.4607     |
| SCO1225    | osmoprotectant transporter                 | -3.4528     |
| SCO5223    | cytochrome P450                            | -3.4251     |

---

|            |                                                  |         |
|------------|--------------------------------------------------|---------|
| SCO2114    | hypothetical protein                             | -3.3982 |
| SCO6173    | permease SC6C509                                 | -3.3663 |
| Novel00345 | -//-                                             | -3.3457 |
| SCO6172    | oxidoreductase                                   | -3.2994 |
| SCO0165    | hypothetical protein                             | -3.1387 |
| SCO1454    | amino oxidase                                    | -3.0892 |
| Novel00053 | -//-                                             | -3.0655 |
| SCO3285    | large glycine/alanine rich protein               | -2.9456 |
| Novel00027 | -//-                                             | -2.9402 |
| Novel00161 | -//-                                             | -2.8693 |
| Novel00052 | -//-                                             | -2.7652 |
| SCO1224    | sugar-phosphate isomerase                        | -2.7421 |
| SCO1455    | hydrolase                                        | -2.6558 |
| SCO4971    | dehydrogenase                                    | -2.4937 |
| SCO0912    | hypothetical protein                             | -2.4055 |
| SCO1175    | hypothetical protein                             | -2.4051 |
| SCO1901    | zinc-binding dehydrogenase                       | -2.2764 |
| SCO0760    | methyltransferase                                | -2.2371 |
| SCO1341    | lipoprotein                                      | -2.1438 |
| SCO6720    | ABC transporter                                  | -2.0997 |
| Med-ORF5   | unknown                                          | -2.41   |
| Med-ORF6   | short-chain dehydrogenase/ reductase SDR         | -2.45   |
| Med-ORF11  | transcriptional regulator, SARP family           | -2.43   |
| Med-ORF12  | 3-hydroxybutyryl-CoA dehydrogenase               | -2.04   |
| Med-ORF23  | acyl carrier protein                             | -3.23   |
| Med-ORF24  | 4'-phosphopantetheinyl transferase               | -2.51   |
| Med-ORF25  | drug resistance transporter, EmrB/QacA           | -2.35   |
| Med-ORF26  | unknown                                          | -3.01   |
| Med-ORF28  | TetR family transcriptional regulator            | -3.07   |
| Med-ORF29  | crotonyl-CoA reductase/ alcohol<br>dehydrogenase | -2.26   |
| Med-ORF-30 | regulator                                        | -6.34   |

---

**Table S3.** The upregulated genes in CH999/pIK340- $\Delta$ med10 ( $\log_2(\text{fold change}) > 1$  or  $< -1$  and P-value  $< 0.05$ ) using transcriptomics.

| <b>Name</b> | <b>Putative gene product</b>        | <b>Fold-change</b> |
|-------------|-------------------------------------|--------------------|
| SCO4359     | ABC transporter ATP-binding protein | 5.984              |
| Novel00105  | -/-                                 | 5.4971             |
| Novel00106  | -/-                                 | 5.264              |
| SCO4360     | ABC transporter                     | 5.2572             |
| Novel00208  | -/-                                 | 5.175              |
| SCO5390     | alkanal monooxygenase               | 3.9793             |
| SCO4361     | hypothetical protein                | 3.8669             |
| SCO6394     | IS element ATP binding protein      | 3.3109             |
| Novel00373  | -/-                                 | 3.148              |
| SCO6393     | transposase                         | 3.1001             |
| SCO0682     | hypothetical protein                | 3.0914             |
| SCO4412     | regulatory protein                  | 2.9698             |
| Novel00131  | -/-                                 | 2.7363             |
| SCO1161     | hypothetical protein                | 2.4752             |
| SCO2954     | RNA polymerase sigma factor SigL    | 2.2696             |

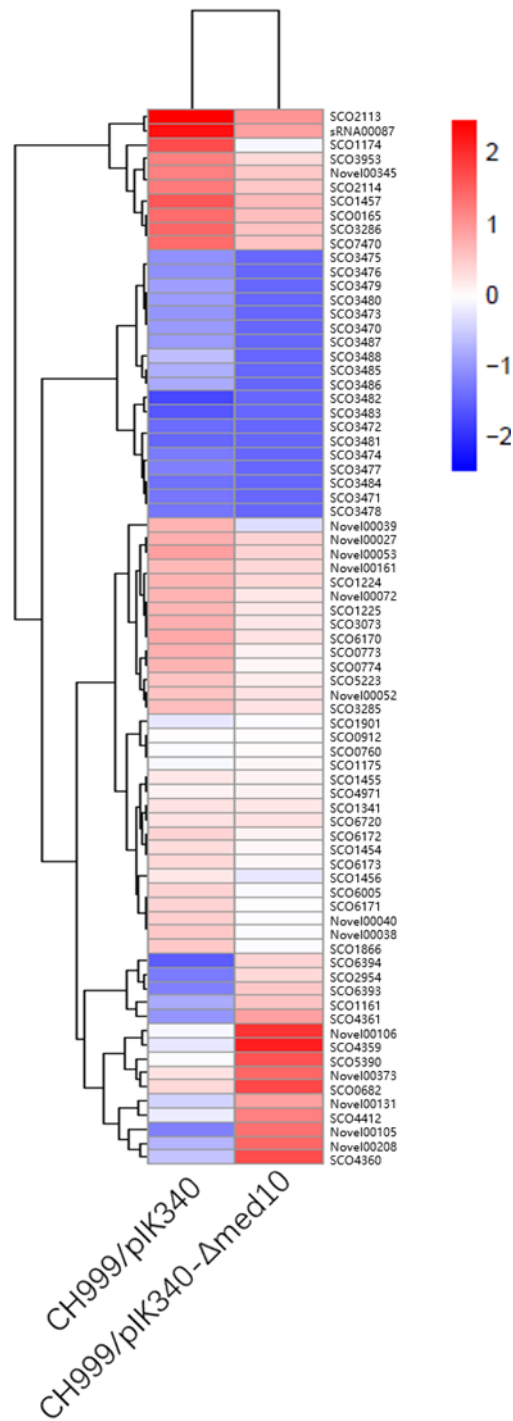

**Fig. S1.** The overall FPKM hierarchical clustering diagram. The  $\log_{10}(\text{FPKM} + 1)$  value is normalized and converted (scale number) and clustered. Red indicates high-expressed genes, and blue indicates low-expressed genes. The color is from red to blue, which means  $\log_{10}(\text{FPKM} + 1)$  from large to small.

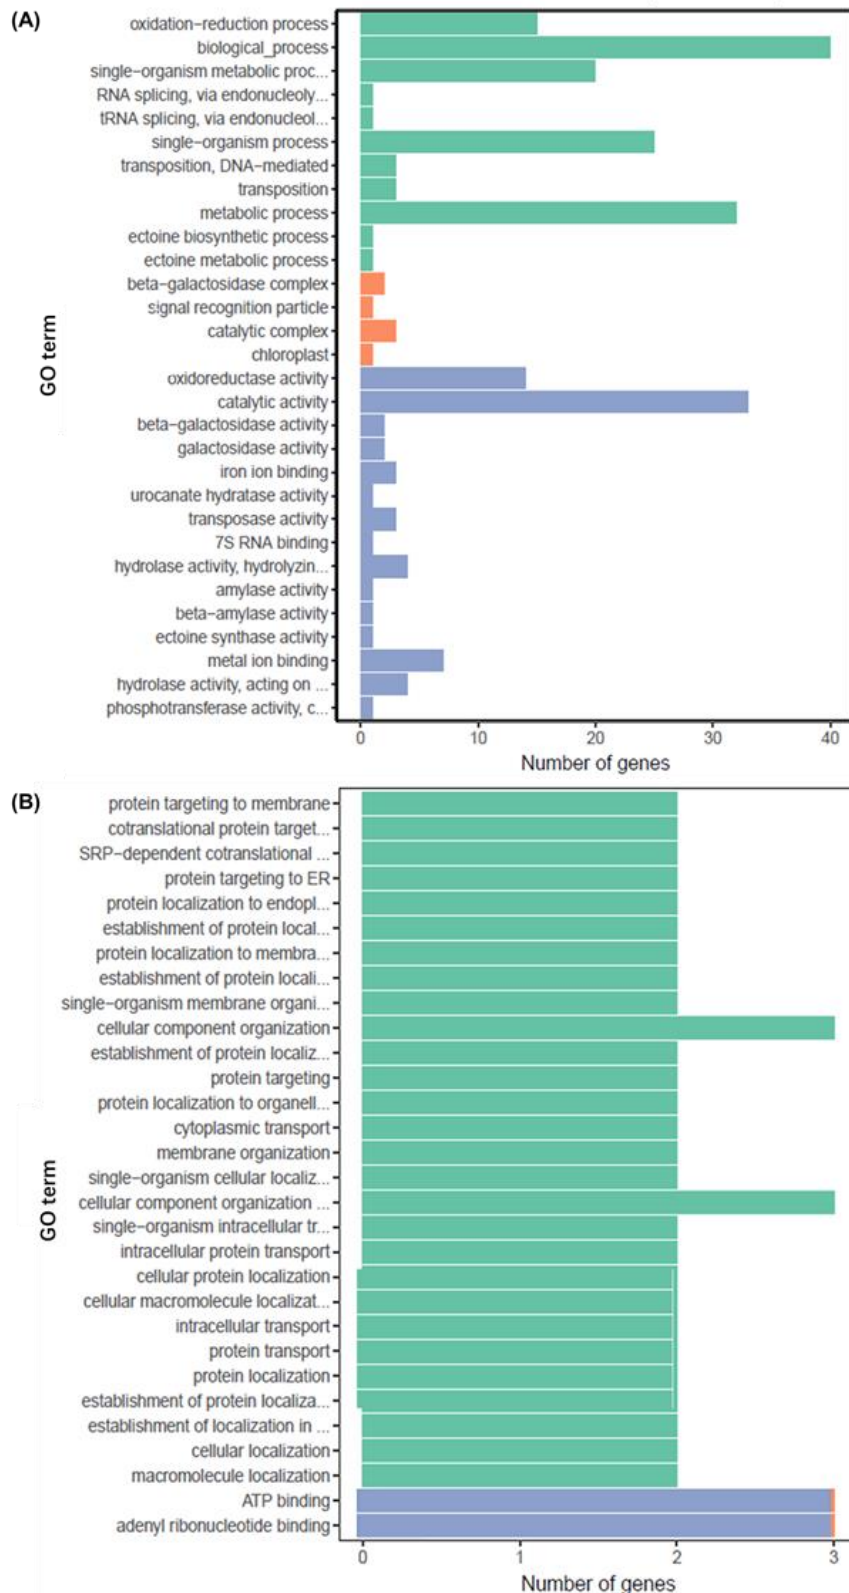

**Fig. S2.** The ordinate is the enriched GO term, and the abscissa is the number of differential genes in the term.

Different colors are used to distinguish biological processes, cellular components and molecular functions. Genes in (A) is down regulated and genes in (B) is up regulated.



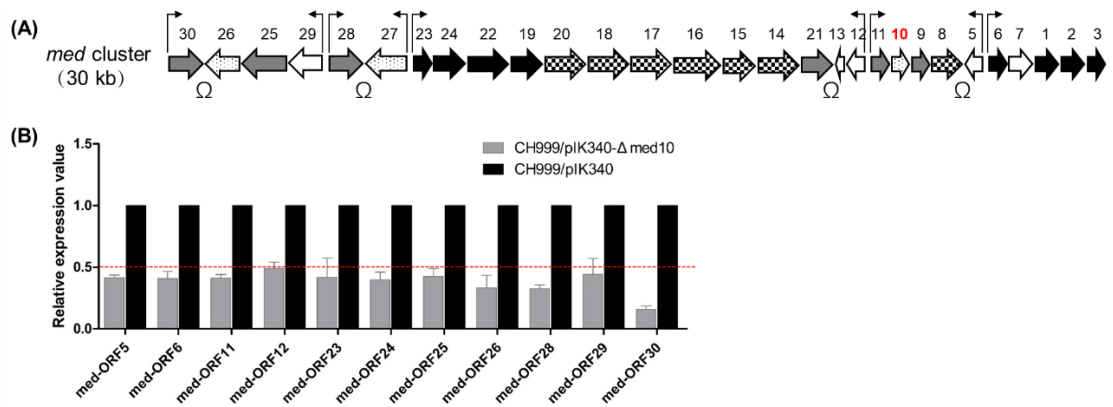

**Fig. S3.** The proposed operons in *med* gene cluster. (A) and differential expression of *med* genes using transcriptomics. (B)  $\Omega$ : terminators; arrow: promoters. Genes lower than that the dashed line indicated the differential expression. The y-axis indicated the expression difference ( $P < 0.05$  and  $\log_2$  (fold-change)  $> 1$  or  $< -1$ ) of *med* genes between CH999/pIK340 and CH999/pIK340- $\Delta med10$ . The transcriptional level of different genes from CH999/pIK340 was normalized into 1.
